# Supplementary material for: Combined analysis of transcriptomics and metabolomics on the cumulative effect of nano-titanium dioxide on mulberry seedlings
Source: Front Plant Sci. 2023 Jun 14;14:1175012. doi: 10.3389/fpls.2023.1175012 (PMC10301732; doi:10.3389/fpls.2023.1175012)
Supplement: Supplementary file 1 [file DataSheet_1.docx]

Supplementary Material

Combined analysis of transcriptomics and metabonomics on the cumulative effect of nano-titanium dioxide on mulberry seedlings

Dongliang Yu1, Qingyu Lu1, Yuting Wei1, Di Hou1, Xingcan Yin 1, Kunpei Cai1, Changyu Qiu3, Kaizun Xu1,2*

1College of Agriculture, Guangxi University, Nanning, Guangxi 530004, PR China

2Guangxi Key Laboratory of Agro-Environment and Agric-Products Safety, National Demonstration Center for Experimental Plant Science Education, College of Agriculture, Guangxi University, Nanning, Guangxi 530004, PR China

3Sericulture Technology Promotion Station of Guangxi Zhuang Autonomous Region, Nanning, Guangxi 530007, PR China

*** Correspondence:**Corresponding Author: Kaizun Xu, Department of Plant Protection, College of Agriculture, Guangxi University, Nanning 530004, PR China
[kzxu@gxu.edu.cn](mailto:kzxu@gxu.edu.cn)

# Supplementary Data

**
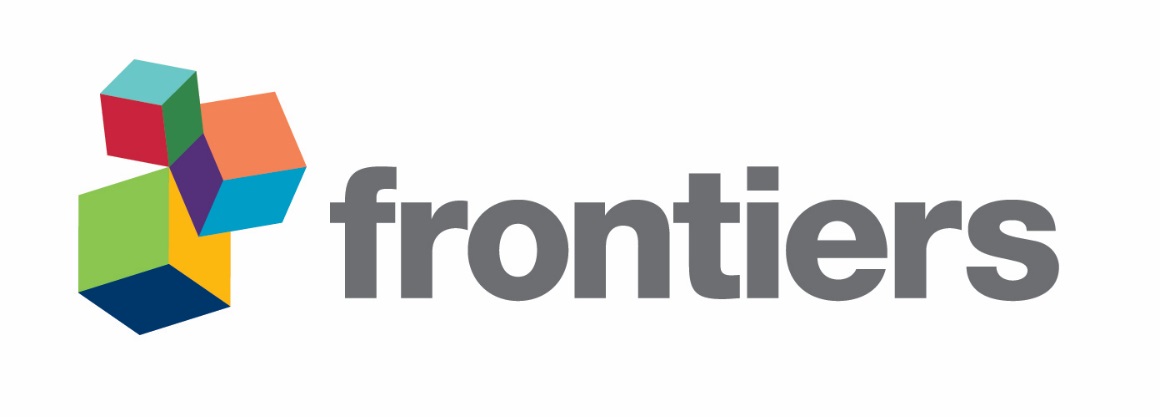
**

**Text S1.** The calculation formula of germination index.

**Text S2.** The calculation formula of photosynthetic pigment content calculation.

**Fig S1.** The pattern diagram of toxicity mechanism of TiO2 NPs to mulberry seedlings.

**Table S1.** Primers used in this study.

**Table S2.** Germination indexes of different concentrations of TiO2 NPs.

**Table S3.** Screening of differentially transcribed genes

**Table S4.** Correlation analysis of transcriptomic and metabolomic data.

**Text S1. The calculation formula of germination index.**

Germination rate (%) = germination number of seeds/total number of seeds ×100% (1)

Germination potential (%) = number of germinated seeds at germination peak/total number of tested seeds ×100% (2)

Germinating index = ∑ (germinating number at time t/t) (3)

Vigor index = fresh weight of seedlings ×∑ (germinated number at time t/t) (4)

**Text S2. The calculation formula of photosynthetic pigment content calculation.**

[Chlorophyll a] = 13.95A665 – 6.88A649 (5)

[Chlorophyll b] = 24.96A649 – 7.32A665 (6)

[Carotenoids] = [1000A470 – 2.05(Chlorophyll a) – 114.8(Chlorophyll b)]/245 (7)

**Table S1. Primers used in this study.**

| Gene name | Primer sequences (5’ - 3’) | Length of product (bp) |
| --- | --- | --- |
| *β-actin* | F：TCCGATGCCCAGAAGTCCTC | 189 |
|  | R：TGATCTCCTTGCTCATCCTGTCT |  |
| *PNC1* | F：AGTCGAATTTGGTTCCCGCT | 136 |
|  | R：TGCTTCACCCAGTCCACAAA |  |
| *XylA* | F：TGGACACCGACGCATCATTA | 151 |
|  | R：GTAACTGTCCCTGGAGCCAC |  |
| *ABCC8* | F：TGGACACCGACGCATCATTA | 151 |
|  | R：GTAACTGTCCCTGGAGCCAC |  |
| *CcnD3* | F：TCCCAAGAGAAAGAAGCACGA | 175 |
|  | R：GCCTTCCTCAATCAAGCCAC |  |
| *Hsp83* | F：TCGGTGTCGGGTTTTACTCG | 159 |
|  | R：TCTTGGTTCCTCTGCCCAAC |  |

**Table S2. Germination indexes of different concentrations of TiO2 NPs. *Indicates that the difference reaches a significant level (P < 0.05), ** indicates that the difference reaches a very significant level (P < 0.01).**

| Germination index | 0 mg/L | 100 mg/L | 200 mg/L | 400 mg/L | 800 mg/L |
| --- | --- | --- | --- | --- | --- |
| Germination potential (%) | 56.3±1.76 | 33.7±1.86** | 30.3±0.88** | 27.0±1.73** | 27.7±0.88** |
| Fresh weight (g) | 0.017±0.0002 | 0.014±0.0007* | 0.013±0.0008** | 0.014±0.0008* | 0.012±0.0005** |
| Germination index | 82.4±2.22 | 63.7± 1.55** | 55.7± 2.17** | 55.4±2.28** | 50.7±1.16** |
| Vitality index | 1.4±.055 | 0.9±.030** | 0.7± .048** | 0.8±0.074** | 0.6±0.024** |

**Table S3. Screening of differentially transcribed genes**

| Name | Sequence ID | Q value | log2(TiO2 NPs/Control) |
| --- | --- | --- | --- |
| Energy synthesis and transportation |  |  |  |
| *nicotinamidase 1* | L484_000190.t01 | 3.67E-05 | -1.731976527 |
| *ABC transporter C family member 8* | L484_004550.t01 | 2.18E-06 | -0.80898406 |
| *NADP-dependent alkenal double bond reductase P2* | L484_018505.t01 | 1.18E-05 | -0.805298024 |
| *putative transporter MCH1* | *L484_022567.t01* | *4.33E-05* | *-1.185756357* |
| *Xylose isomerase* | *L484_022871.t01* | *1.04E-22* | *-2.897943211* |
| *L-ascorbate peroxidase 3* | L484_024998.t01 | 1.20E-05 | -0.518696928 |
| Protein metabolism |  |  |  |
| *desiccation-related protein* | L484_005955.t01 | 3.49E-05 | -1.155742517 |
| *Protein kinase byr2* | [*L484_007594.t01*](https://report.bgi.com/ps/tools/index.html#/home/geneDetail/L484_007594.t01) | *9.94E-06* | *-1.217042195* |
| *Disease resistance protein RPM1* | L484_009582.t01 | 3.84E-05 | 0.753717898 |
| *protein DETOXIFICATION 19* | L484_009604.t01 | 3.01E-06 | -0.654981094 |
| *RNA-binding protein 24* | [L484_012724.t01](https://report.bgi.com/ps/tools/index.html#/home/geneDetail/L484_012724.t01) | 2.03E-05 | 0.829112256 |
| *Heat shock protein 83* | L484_024225.t01 | 2.89E-08 | -1.411219149 |
| Response to stress |  |  |  |
| *Serine/threonine-protein kinase HT1* | L484_006079.t01 | 2.31E-05 | 0.721787463 |
| *DnaJ homolog subfamily B member 13* | L484_015060.t01 | 2.28E-05 | -0.968603771 |
| *Inositol-3-phosphate synthase* | [L484_016608.t01](https://report.bgi.com/ps/tools/index.html#/home/geneDetail/L484_016608.t01) | 1.23E-05 | -1.374791371 |
| *Protein farnesyl transferase subunit beta* | L484_020495.t01 | 5.30E-07 | -0.539253083 |
| *Salicylate O-methyltransferase* | L484_026743.t01 | 3.51E-08 | -1.787969408 |
| *Morus notabilis cyclin-D3-1* | L484_027417.t01 | 4.19E-05 | 1.291867097 |

**Table S4. Correlation analysis of transcriptomic and metabolomic data**

| **No.** | **Gene name** | **GeneID** | **R** | **pvalue** |
| --- | --- | --- | --- | --- |
| **6,12,17-Trihydroxy-16-methyl-8-2,4,14,19-tetraoxahexacyclo-nonadecane-5,15,18-trione related genes** | | | | |
| 1 | Flavonoid 3'-monooxygenase | L484_004711.t01 | -0.94286 | 0.016667* |
| **methyl 6-O-β-D-glucopyranoside related genes** | | | | |
| 1 | ABC transporter C family member 8 | L484_004550.t01 | -0.94286 | 0.016667* |
| 2 | Desiccation-related protein | L484_005955.t01 | -0.94286 | 0.016667* |
| 3 | Serine/threonine-protein kinase HT1 | L484_006079.t01 | 0.942857 | 0.016667* |
| 4 | DnaJ homolog subfamily B member 13 | L484_015060.t01 | -0.94286 | 0.016667* |
| 5 | Heat shock protein 83 | L484_024225.t01 | -0.94286 | 0.016667* |
| 6 | L-ascorbate peroxidase 3 | L484_024998.t01 | -0.94286 | 0.016667* |
| **propanyl hexopyranoside related genes** | | | | |
| 1 | Acyl-[acyl-carrier-protein] desaturase 6 | L484_003523.t01 | 1 | 0.002778** |
| 2 | ABC transporter C family member 8 | L484_004550.t01 | -0.94286 | 0.016667* |
| 3 | Desiccation-related protein PCC13-62 | L484_005955.t01 | -0.94286 | 0.016667* |
| 4 | Serine/threonine-protein kinase HT1 | L484_006079.t01 | 0.942857 | 0.016667* |
| 5 | Protein kinase byr2 | L484_007594.t01 | -0.94286 | 0.016667* |
| 6 | Detoxfication protein 19 | L484_009604.t01 | -0.92763 | 0.007666** |
| 7 | DnaJ homolog subfamily B member 13 | L484_015060.t01 | -0.94286 | 0.016667* |
| 8 | Protein farnesyltransferase subunit beta | L484_020495.t01 | -0.94286 | 0.016667* |
| 9 | Hypothetical protein | L484_022566.t01 | -1 | 0.002778** |
| 10 | Putative transporter MCH1 | L484_022567.t01 | -1 | 0.002778** |
| 11 | Heat shock protein 83 | L484_024225.t01 | -0.94286 | 0.016667* |
| **2-Amino-1-phenylethanol related genes** | | | | |
| 1 | ABC transporter C family member 8 | L484_004550.t01 | -0.94286 | 0.016667* |
| 2 | Serine/threonine-protein kinase HT1 | L484_006079.t01 | 0.942857 | 0.016667* |
| 3 | Disease resistance protein RPM1 | L484_009582.t01 | 1 | 0.002778** |
| 4 | Transcription factor bHLH130 | L484_010917.t01 | 0.942857 | 0.016667* |
| 5 | RNA-binding protein 24 | L484_012724.t01 | 1 | 0.002778** |
| 6 | DnaJ homolog subfamily B member 13 | L484_015060.t01 | -0.94286 | 0.016667* |
| 7 | Inositol-3-phosphate synthase | L484_016608.t01 | -0.94286 | 0.016667* |
| 8 | NADP-dependent alkenal double bond reductase P2 | L484_018505.t01 | -0.94286 | 0.01666*7 |
| 9 | Heat shock protein 83 | L484_024225.t01 | -0.94286 | 0.01666*7 |
| **2-Hydroxy-3-phenyl β-D-glucopyranoside related genes** | | | | |
| 1 | Putative receptor protein kinase TMK1 | L484_001220.t01 | 0.942857 | 0.016667* |
| 2 | Flavonoid 3'-monooxygenase | L484_004711.t01 | -0.94286 | 0.016667* |
| 3 | Putative methyltransferase PMT18 | L484_011830.t01 | -0.94112 | 0.005098** |
| 4 | L-ascorbate peroxidase 3 | L484_024998.t01 | -1 | 0.002778** |
| 5 | Topless-related protein 4 | L484_025769.t01 | 0.942857 | 0.016667* |
| **4-Ethoxy ethylbenzoate related genes** | | | | |
| 1 | Homogentisate solanesyltransferase | BGI_novel_G001371 | 0.942857 | 0.016667* |
| 2 | Flavonoid 3'-monooxygenase | L484_004711.t01 | -1 | 0.002778** |
| 3 | Putative methyltransferase PMT18 | L484_011830.t01 | -0.94112 | 0.005098** |
| 4 | L-ascorbate peroxidase 3 | L484_024998.t01 | -0.94286 | 0.016667* |
| **App-fubinaca related genes** | | | | |
| 1 | Morus notabilis protein NRT1 | BGI_novel_G000340 | 0.942857 | 0.016667* |
| 2 | Disease resistance-like protein | BGI_novel_G000537 | -0.94286 | 0.016667* |
| 3 | Nicotinamidase 1 | L484_000190.t01 | -0.98561 | 0.000309** |
| 4 | Uncharacterized | L484_013893.t01 | -0.94286 | 0.016667* |
| 5 | Cyclin-D3-1 | L484_027417.t01 | 0.942857 | 0.016667* |
| **Cinnamic acid related genes** | | | | |
| 1 | Homogentisate solanesyltransferase | BGI_novel_G001371 | 0.942857 | 0.016667* |
| 2 | Flavonoid 3'-monooxygenase | L484_004711.t01 | -1 | 0.002778** |
| 3 | Putative methyltransferase PMT18 | L484_011830.t01 | -0.94112 | 0.005098** |
| 4 | L-ascorbate peroxidase 3 | L484_024998.t01 | -0.94286 | 0.016667* |
| **cis-Aconitic acid related genes** | | | | |
| 1 | Morus notabilis protein NRT1 | BGI_novel_G000340 | 0.942857 | 0.016667* |
| 2 | Homogentisate solanesyltransferase | BGI_novel_G001371 | 0.942857 | 0.016667* |
| 3 | Cyclin-D3-1 | L484_027417.t01 | 0.942857 | 0.016667* |
| **Ethyl paraben related genes** | | | | |
| 1 | Homogentisate solanesyltransferase | BGI_novel_G001371 | 0.942857 | 0.016667* |
| 2 | Flavonoid 3'-monooxygenase | L484_004711.t01 | -1 | 0.002778** |
| 3 | Putative methyltransferase PMT18 | L484_011830.t01 | -0.94112 | 0.005098** |
| 4 | L-ascorbate peroxidase 3 | L484_024998.t01 | -0.94286 | 0.016667* |
| **Flavokawain A related genes** | | | | |
| 1 | Acyl-[acyl-carrier-protein] desaturase 6 | L484_003523.t01 | -0.94286 | 0.016667* |
| 2 | Protein kinase byr2 | L484_007594.t01 | 1 | 0.002778** |
| 3 | Detoxfication protein 19 | L484_009604.t01 | 0.985611 | 0.000309** |
| 4 | Protein farnesyltransferase subunit beta | L484_020495.t01 | 1 | 0.002778** |
| 5 | Hypothetical protein | L484_022566.t01 | 0.942857 | 0.016667* |
| 6 | Putative transporter MCH1 | L484_022567.t01 | 0.942857 | 0.016667* |
| 7 | Xylose isomerase | L484_022871.t01 | 0.942857 | 0.016667* |
| **Ipriflavone related genes** | | | | |
| 1 | Morus notabilis protein NRT1 | BGI_novel_G000340 | 1 | 0.002778** |
| 2 | Nicotinamidase 1 | L484_000190.t01 | -0.92763 | 0.007666** |
| 3 | Cyclin-D3-1 | L484_027417.t01 | 1 | 0.002778** |
| **Isopropylidenylacetyl-marmesin related genes** | | | | |
| 1 | Disease resistance-like protein | BGI_novel_G000537 | 1 | 0.002778** |
| 2 | Nicotinamidase 1 | L484_000190.t01 | 0.985611 | 0.000309** |
| 3 | Homogentisate solanesyltransferase | BGI_novel_G001371 | 0.942857 | 0.016667* |
| 4 | Flavonoid 3'-monooxygenase | L484_004711.t01 | -1 | 0.002778** |
| 5 | putative methyltransferase PMT18 | L484_011830.t01 | -0.94112 | 0.005098** |
| 6 | L-ascorbate peroxidase 3 | L484_024998.t01 | -0.94286 | 0.016667* |
| **Lumichrome related genes** | | | | |
| 1 | Uncharacterized | L484_024687.t01 | 0.942857 | 0.016667* |
| **Mulberrin related genes** | | | | |
| 1 | Uncharacterized | L484_013893.t01 | 0.942857 | 0.016667* |
| 2 | Uncharacterized | L484_024687.t01 | 1 | 0.002778** |
| 3 | Salicylate O-methyltransferase | L484_026743.t01 | 0.942857 | 0.016667* |
| **Naringin related genes** | | | | |
| 1 | Disease resistance-like protein | BGI_novel_G000537 | -0.94286 | 0.016667* |
| 2 | Desiccation-related protein PCC13-62 | L484_005955.t01 | -0.94286 | 0.016667* |
| 3 | Protein kinase byr2 | L484_007594.t01 | -0.94286 | 0.016667* |
| 4 | Detoxfication protein 19 | L484_009604.t01 | -0.98561 | 0.000309** |
| 5 | Protein farnesyltransferase subunit beta | L484_020495.t01 | -0.94286 | 0.016667* |
| **Perphenazine related genes** | | | | |
| 1 | Acyl-[acyl-carrier-protein] desaturase 6 | L484_003523.t01 | 0.942857 | 0.016667* |
| 2 | Desiccation-related protein PCC13-62 | L484_005955.t01 | -1 | 0.002778** |
| 3 | Detoxfication protein 19 | L484_009604.t01 | -0.92763 | 0.007666** |
| 4 | Hypothetical protein | L484_022566.t01 | -0.94286 | 0.016667* |
| 5 | Putative transporter MCH1 | L484_022567.t01 | -0.94286 | 0.016667* |
| **Pinoresinol diglucoside related genes** | | | | |
| 1 | Detoxfication protein 19 | L484_009604.t01 | 0.927634 | 0.007666** |
| 2 | Xylose isomerase | L484_022871.t01 | 0.942857 | 0.016667* |
| 3 | Topless-related protein 4 | L484_025769.t01 | -0.94286 | 0.016667* |
| **Quercetin 3-O-rhamnoside-7-O-glucoside related genes** | | | | |
| 1 | L-ascorbate peroxidase 3 | L484_024998.t01 | 0.942857 | 0.016667* |
| 2 | Topless-related protein 4 | L484_025769.t01 | -1 | 0.002778** |
| **Rutin related genes** | | | | |
| 1 | Flavonoid 3'-monooxygenase | L484_004711.t01 | 0.942857 | 0.016667* |
| 2 | Topless-related protein 4 | L484_025769.t01 | -0.94286 | 0.016667* |
| **Sinapic acid related genes** | | | | |
| 1 | ABC transporter C family member 8 | L484_004550.t01 | -0.94286 | 0.016667* |
| 2 | Desiccation-related protein PCC13-62 | L484_005955.t01 | -0.94286 | 0.016667* |
| 3 | Serine/threonine-protein kinase HT1 | L484_006079.t01 | 0.942857 | 0.016667* |
| 4 | DnaJ homolog subfamily B member 13 | L484_015060.t01 | -0.94286 | 0.016667* |
| 5 | Heat shock protein 83 | L484_024225.t01 | -0.94286 | 0.016667* |
| 6 | L-ascorbate peroxidase 3 | L484_024998.t01 | -0.94286 | 0.016667* |
| **Sinapinic acid related genes** | | | | |
| 1 | Acyl-[acyl-carrier-protein] desaturase 6 | L484_003523.t01 | 0.942857 | 0.016667* |
| 2 | Desiccation-related protein PCC13-62 | L484_005955.t01 | -1 | 0.002778** |
| 3 | Detoxfication protein 19 | L484_009604.t01 | -0.92763 | 0.007666** |
| 4 | Hypothetical protein | L484_022566.t01 | -0.94286 | 0.016667* |
| 5 | Putative transporter MCH1 | L484_022567.t01 | -0.94286 | 0.016667* |
| **Sudan III related genes** | | | | |
| 1 | Disease resistance-like protein | BGI_novel_G000537 | 1 | 0.002778** |
| 2 | Nicotinamidase 1 | L484_000190.t01 | 0.985611 | 0.000309** |
| **Vanillin related genes** | | | | |
| 1 | Morus notabilis protein NRT1 | BGI_novel_G000340 | 1 | 0.002778** |
| 2 | Nicotinamidase 1 | L484_000190.t01 | -0.92763 | 0.007666** |
| 3 | Morus notabilis cyclin-D3-1 | L484_027417.t01 | 1 | 0.002778** |
| **Xanthohumol related genes** | | | | |
| 1 | Cannabidiolic acid synthase | BGI_novel_G000544 | -0.94286 | 0.016667* |
| 2 | Putative receptor protein kinase TMK1 | L484_001220.t01 | -0.94286 | 0.016667* |
| 3 | Disease resistance protein RPM1 | L484_009582.t01 | -0.94286 | 0.016667* |
| 4 | Transcription factor bHLH130 | L484_010917.t01 | -1 | 0.002778** |
| 5 | Putative methyltransferase PMT18 | L484_011830.t01 | 0.941124 | 0.005098** |
| 6 | RNA-binding protein 24 | L484_012724.t01 | -0.94286 | 0.016667* |
| 7 | Inositol-3-phosphate synthase | L484_016608.t01 | 1 | 0.002778** |
| 8 | NADP-dependent alkenal double bond reductase P2 | L484_018505.t01 | 1 | 0.002778** |
| **β-Asarone related genes** | | | | |
| 1 | Homogentisate solanesyltransferase | BGI_novel_G001371 | -0.94286 | 0.016667* |
| 2 | Flavonoid 3'-monooxygenase | L484_004711.t01 | 1 | 0.002778** |
| 3 | Putative methyltransferase PMT18 | L484_011830.t01 | 0.941124 | 0.005098** |
| 4 | L-ascorbate peroxidase 3 | L484_024998.t01 | 0.942857 | 0.016667* |
